# Supplementary material for: Dietary restriction and gonadal signaling differentially regulate post‐development quality control functions in Caenorhabditis elegans
Source: PubMed Central journal article supplement (PMC6413660; doi:10.1111/acel.12891), 2019-01-15

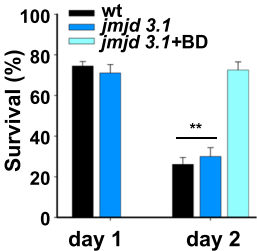

Supplement: ACEL-18-e12891-s003.pdf [file ACEL-18-e12891-s003.pdf]
