# Supplementary material for: Dietary restriction and gonadal signaling differentially regulate post‐development quality control functions in Caenorhabditis elegans
Source: PubMed Central journal article supplement (PMC6413660; doi:10.1111/acel.12891), 2019-01-15
Supplement: ACEL-18-e12891-s004.pdf [file ACEL-18-e12891-s004.pdf]

**A**

Relative mRNA levels (%)

HS

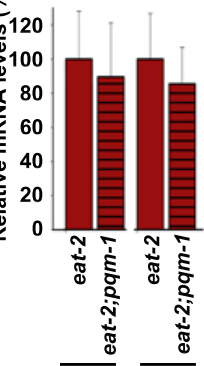**B**

Relative mRNA levels (%)

non HS

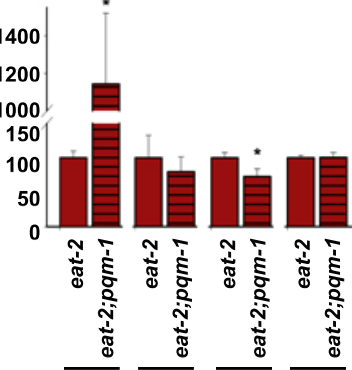

F44E5.4

hsp16.11

F44E5.4

hsp16.11

fkb-6

hsp-25
