# Supplementary material for: Dietary restriction and gonadal signaling differentially regulate post‐development quality control functions in Caenorhabditis elegans
Source: PubMed Central journal article supplement (PMC6413660; doi:10.1111/acel.12891), 2019-01-15
Supplement: ACEL-18-e12891-s007.pdf [file ACEL-18-e12891-s007.pdf]

**Table S2. Heat-inducible chaperones**

| <b>Genes</b>     | <b>Chaperone family</b> | <b>Compartment</b> | <b>Brunquell et al., 2016</b> | <b>Li et al., 2017</b> |
|------------------|-------------------------|--------------------|-------------------------------|------------------------|
| <i>hsp-1</i>     | HSP70                   | Cytoplasm          | +                             | +                      |
| <i>hsp-4</i>     | HSP70                   | ER                 | +                             | +                      |
| <i>hsp-70</i>    | HSP70                   | Cytoplasm          | +                             | +                      |
| <i>F44E5.4</i>   | HSP70                   | Cytoplasm          | +                             | +                      |
| <i>F44E5.5</i>   | HSP70                   | Cytoplasm          | +                             | +                      |
| <i>dnj-11</i>    | HSP40                   | Cytoplasm          |                               | +                      |
| <i>dnj-13</i>    | HSP40                   | Cytoplasm          | +                             | +                      |
| <i>K07F5.16</i>  | HSP40                   | Cytoplasm          |                               | +                      |
| <i>unc-23</i>    | NEF                     | Cytoplasm          | +                             | +                      |
| <i>hsp-110</i>   | NEF                     | Cytoplasm          | +                             | +                      |
| <i>daf-21</i>    | HSP90                   | Cytoplasm          | +                             |                        |
| <i>C01G10.8</i>  | coHSP90                 | Cytoplasm          |                               | +                      |
| <i>sti-1</i>     | coHSP90                 | Cytoplasm          | +                             |                        |
| <i>hsp-12.3</i>  | sHSP                    | Cytoplasm          |                               | +                      |
| <i>hsp-12.6</i>  | sHSP                    | Cytoplasm          | +                             |                        |
| <i>sip-1</i>     | sHSP                    | Cytoplasm          |                               | +                      |
| <i>hsp-16.1</i>  | sHSP                    | Cytoplasm          | +                             | +                      |
| <i>hsp-16.11</i> | sHSP                    | Cytoplasm          | +                             | +                      |
| <i>hsp-16.2</i>  | sHSP                    | Cytoplasm          | +                             | +                      |
| <i>hsp-16.41</i> | sHSP                    | Cytoplasm          | +                             | +                      |
| <i>hsp-16.48</i> | sHSP                    | Cytoplasm          | +                             |                        |
| <i>hsp-16.49</i> | sHSP                    | Cytoplasm          | +                             | +                      |
